# Supplementary material for: Controllable construction of oxygen vacancies by anaerobic catalytic combustion of dichloromethane over metal oxides for enhanced solar-to-hydrogen conversion
Source: Royal Society of Chemistry journal article supplement (doi:10.1039/c9se00464e), 2019-01-01
Supplement: c9se00464e1.pdf [file c9se00464e1.pdf]

## **Electronic Supplementary Information**

### **Controllable construction of oxygen vacancies by anaerobic catalytic combustion of dichloromethane over metal oxides for enhanced solar-to-hydrogen conversion**

Sufen Zhang, Jianni Liu, Xiaoyang Dong, Xiaoxia Jia, Ziwei Gao, and  
Quan Gu\*

Key Laboratory of Applied Surface and Colloid Chemistry, Ministry of  
Education, School of Chemistry and Chemical Engineering, Shaanxi  
Normal University, Xi'an, 710062, China

\*E-mail: [guquan@snnu.edu.cn](mailto:guquan@snnu.edu.cn)

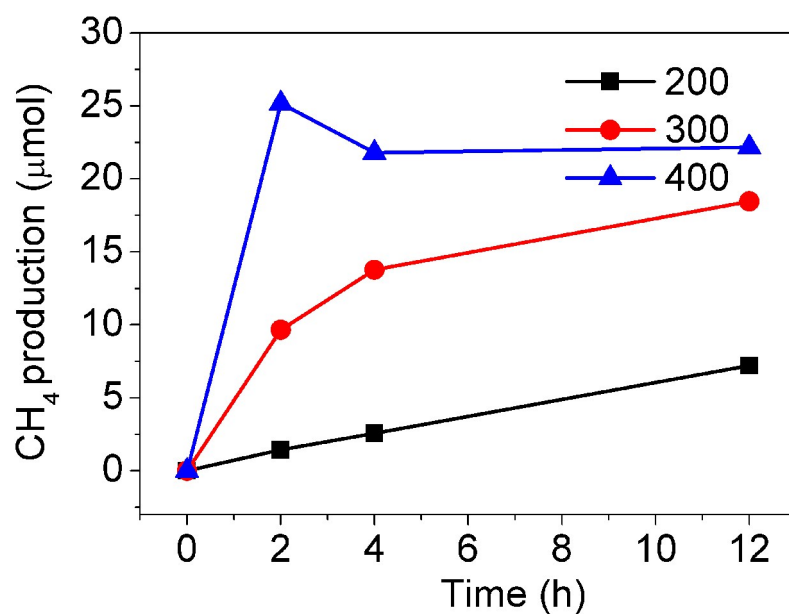

Figure S1 amount of CH<sub>4</sub> detected by GC during the reaction of CH<sub>2</sub>Cl<sub>2</sub> with TiO<sub>2</sub> at 200, 300, and 400 °C.

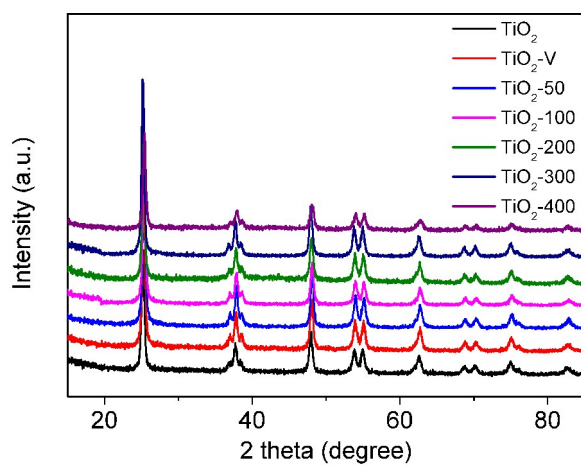

Figure S2 XRD patterns of TiO<sub>2</sub>, TiO<sub>2</sub>-V, and TiO<sub>2</sub>-T (T=50, 100, 200, 300, and 400).

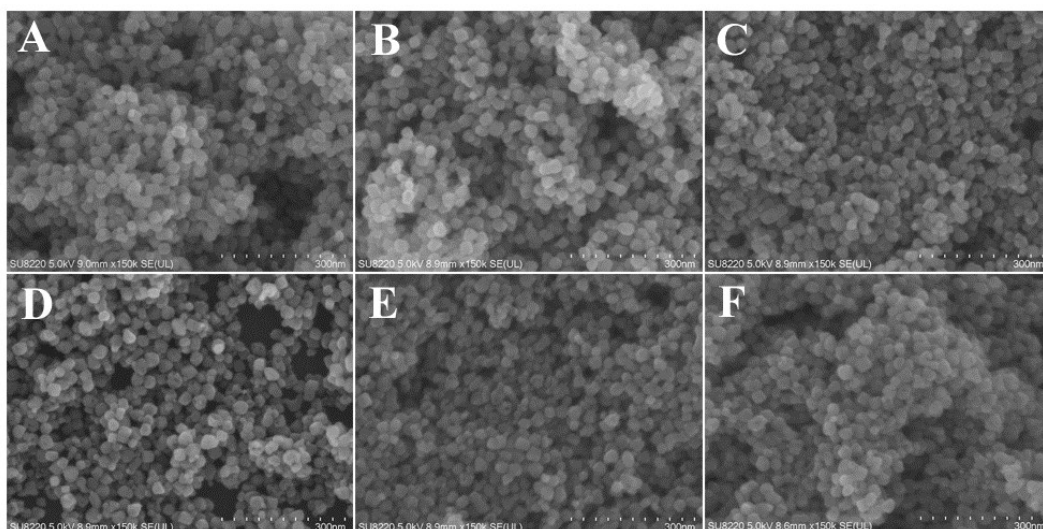

Figure S3 SEM images of TiO<sub>2</sub> (A), TiO<sub>2</sub>-50 (B), TiO<sub>2</sub>-100 (C), TiO<sub>2</sub>-200 (D), TiO<sub>2</sub>-300 (E), and TiO<sub>2</sub>-400 (F).

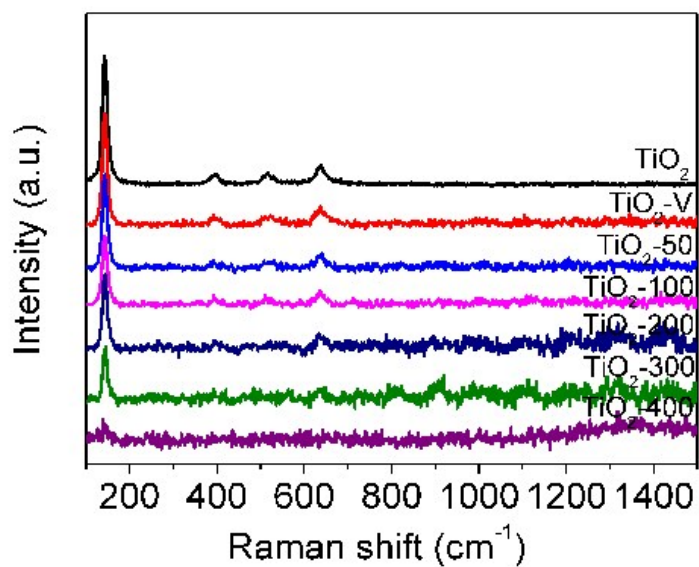

Figure S4 Raman spectra of TiO<sub>2</sub>, TiO<sub>2</sub>-V, and TiO<sub>2</sub>-T (T=50, 100, 200, 300, and 400) obtained at different reaction temperature.

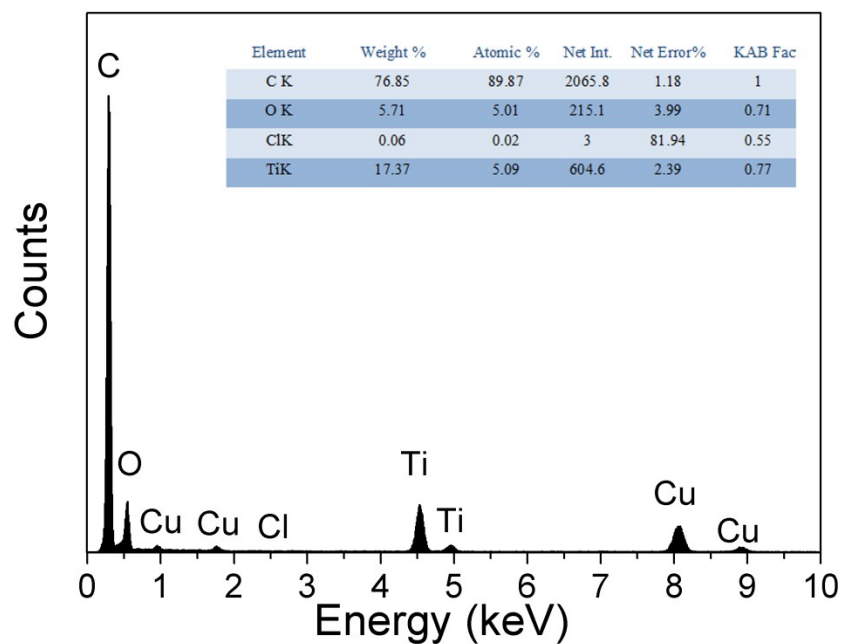

Figure S5 EDX image of TiO<sub>2</sub>-200.

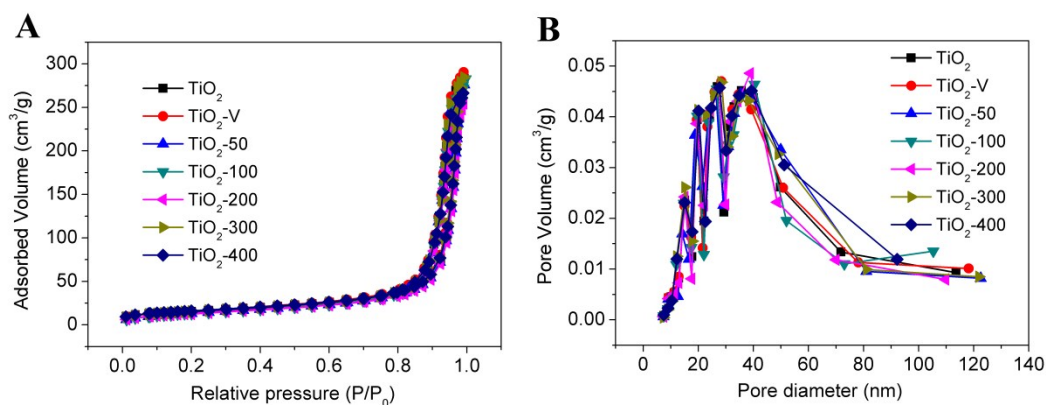

Figure S6 the nitrogen adsorption-desorption isotherms (A) and the corresponding pore-size distribution curves (B) of TiO<sub>2</sub> and TiO<sub>2</sub>-T (T=50, 100, 200, 300, and 400) obtained at different reaction temperature.

Table S1 summary of the physicochemical characteristics of as-prepared samples.

| sample                | Pore volume (ml/g) | Pore size (nm) | S <sub>BET</sub> (m <sup>2</sup> /g) |
|-----------------------|--------------------|----------------|--------------------------------------|
| TiO <sub>2</sub>      | 0.5385             | 26.46          | 55.3                                 |
| TiO <sub>2</sub> -V   | 0.4499             | 25.95          | 56.9                                 |
| TiO <sub>2</sub> -50  | 0.4272             | 26.49          | 51.3                                 |
| TiO <sub>2</sub> -100 | 0.4250             | 26.31          | 51.5                                 |
| TiO <sub>2</sub> -200 | 0.3938             | 25.96          | 49.5                                 |
| TiO <sub>2</sub> -300 | 0.4408             | 25.99          | 57.3                                 |
| TiO <sub>2</sub> -400 | 0.4127             | 25.81          | 57.6                                 |

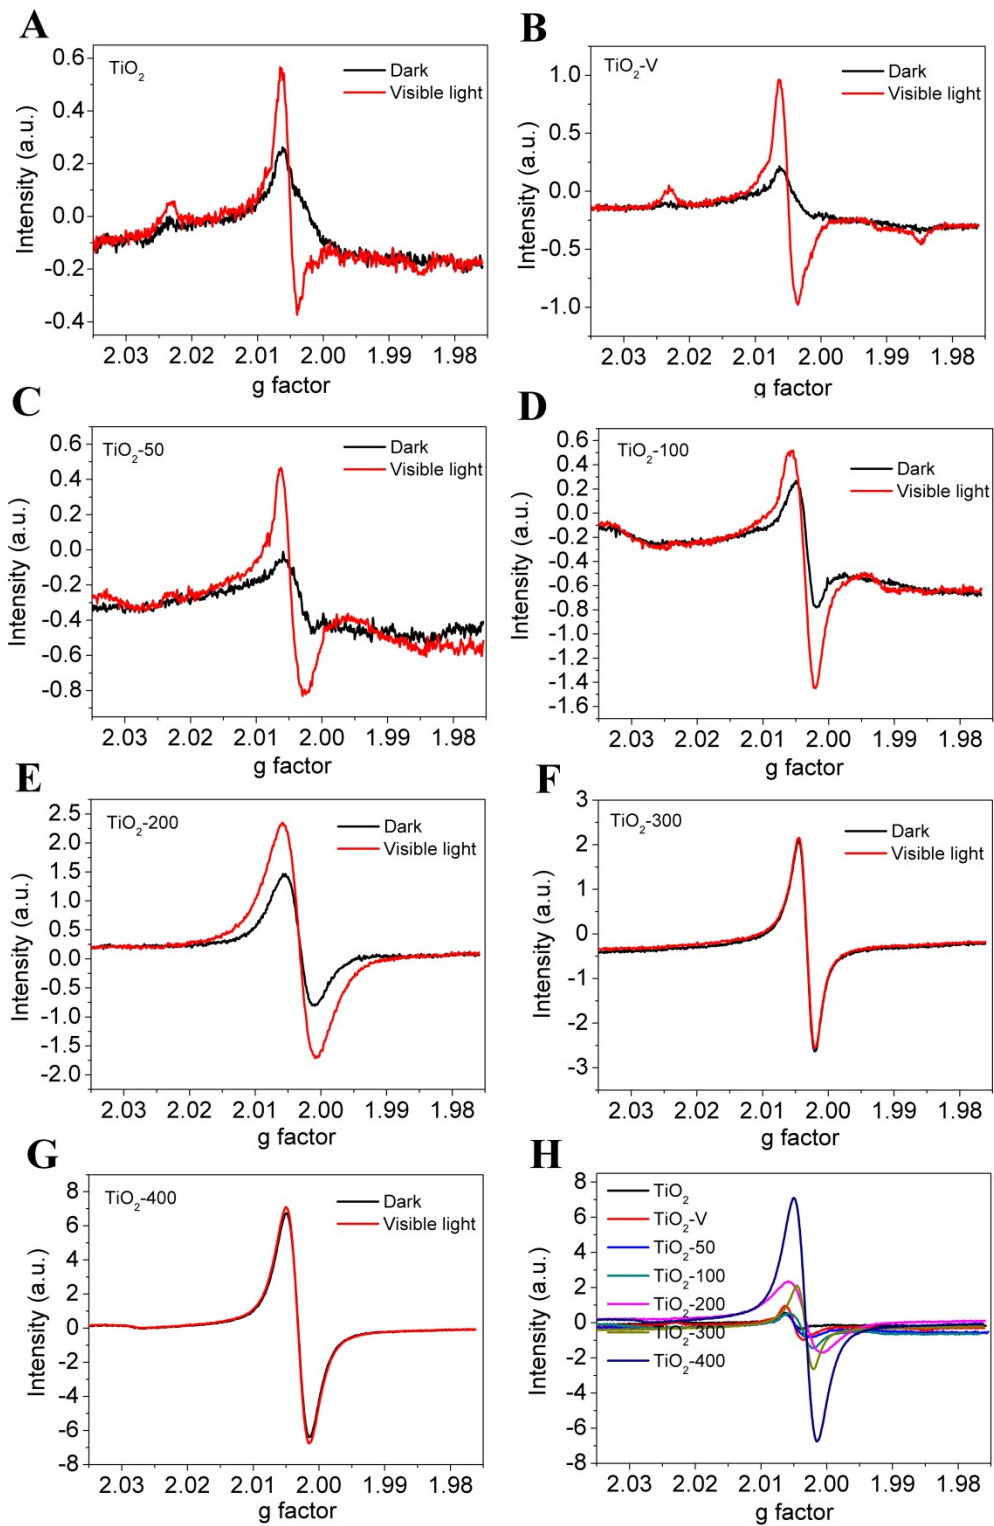

Figure S7 EPR spectra of  $\text{TiO}_2$ ,  $\text{TiO}_2\text{-V}$ , and  $\text{TiO}_2\text{-T}$  (T=50, 100, 200, 300, and 400) obtained at different reaction temperature determined at 140 K under dark and visible light irradiation.

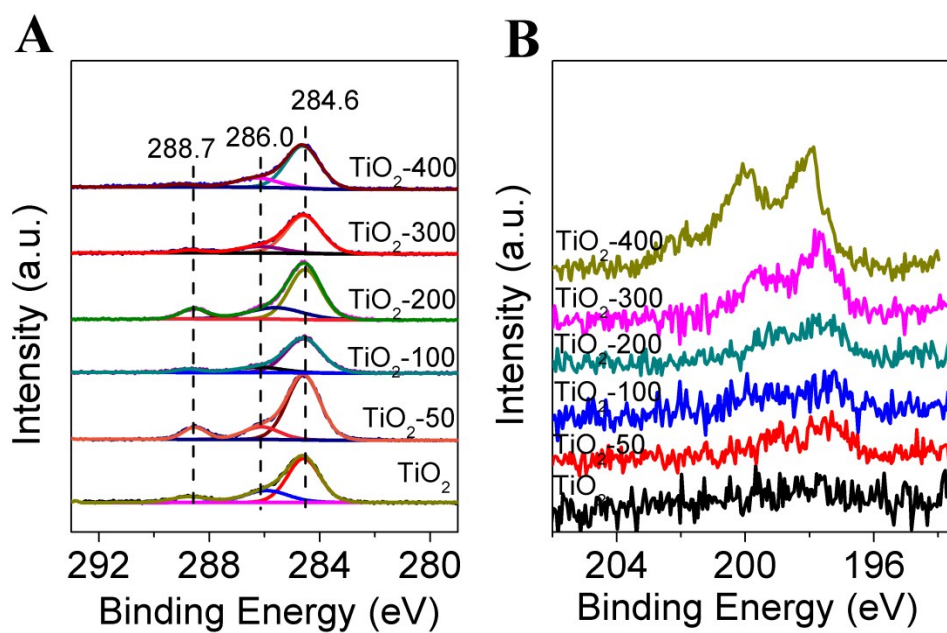

Figure S8 high-resolution C 1s and Cl 2p XPS spectra of TiO<sub>2</sub> and TiO<sub>2</sub>-T (T=50, 100, 200, 300, and 400) obtained at different reaction temperature.

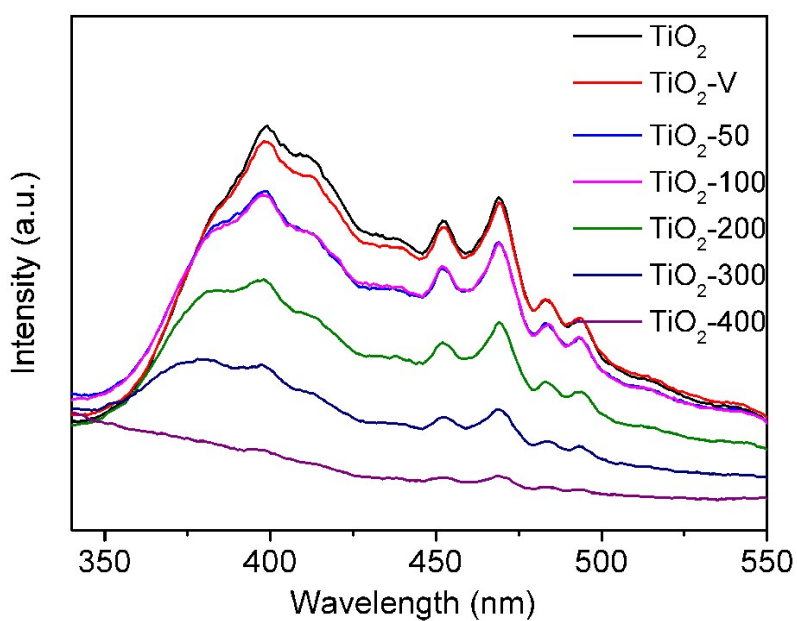

Figure S9 PL spectra of TiO<sub>2</sub>, TiO<sub>2</sub>-V, and TiO<sub>2</sub>-T (T=50, 100, 200, 300, and 400) obtained at different reaction temperature.

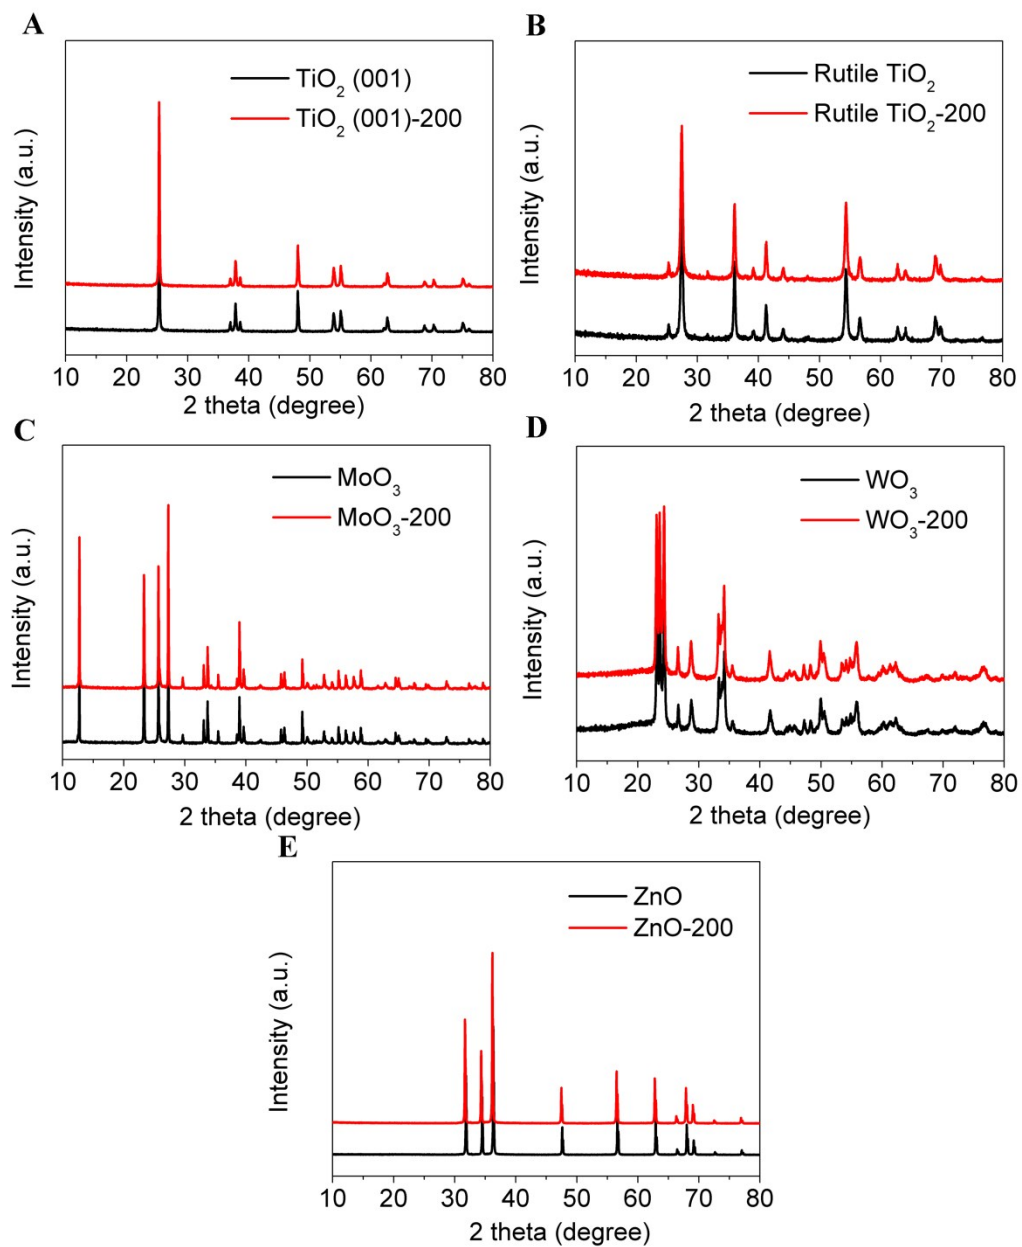

Figure S10 XRD patterns of (A)  $\text{TiO}_2$  (001), (B) rutile  $\text{TiO}_2$ , (C)  $\text{MoO}_3$ , (D)  $\text{WO}_3$ , and (E) ZnO before and after treatment.



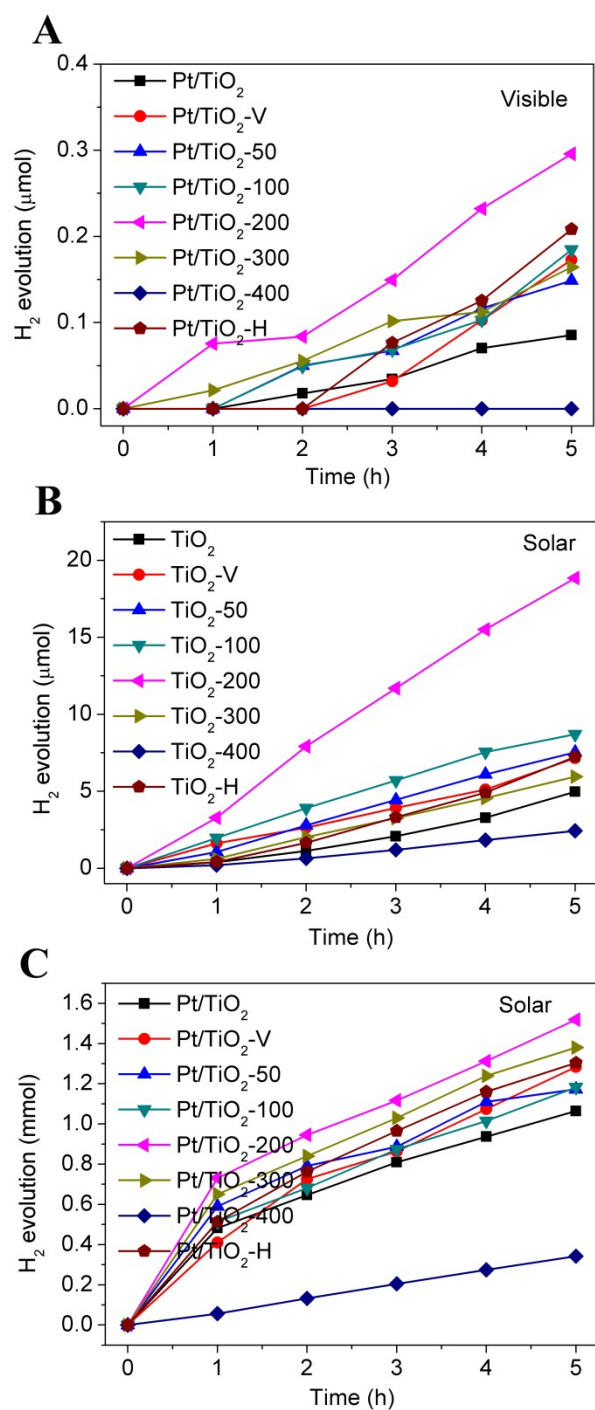

Figure S11 (A) Hydrogen evolution amount of Pt supported samples from ethanol solution (10 vol%) under visible light irradiation. (B) Hydrogen evolution amount of TiO<sub>2</sub>, TiO<sub>2</sub>-T (T=50, 100, 200, 300, and 400) obtained at different reaction temperature, TiO<sub>2</sub>-V, and TiO<sub>2</sub>-H from ethanol solution (10 vol%) solar light irradiation. (C) Hydrogen evolution amount of Pt supported samples from ethanol solution (10 vol%) under solar light irradiation.

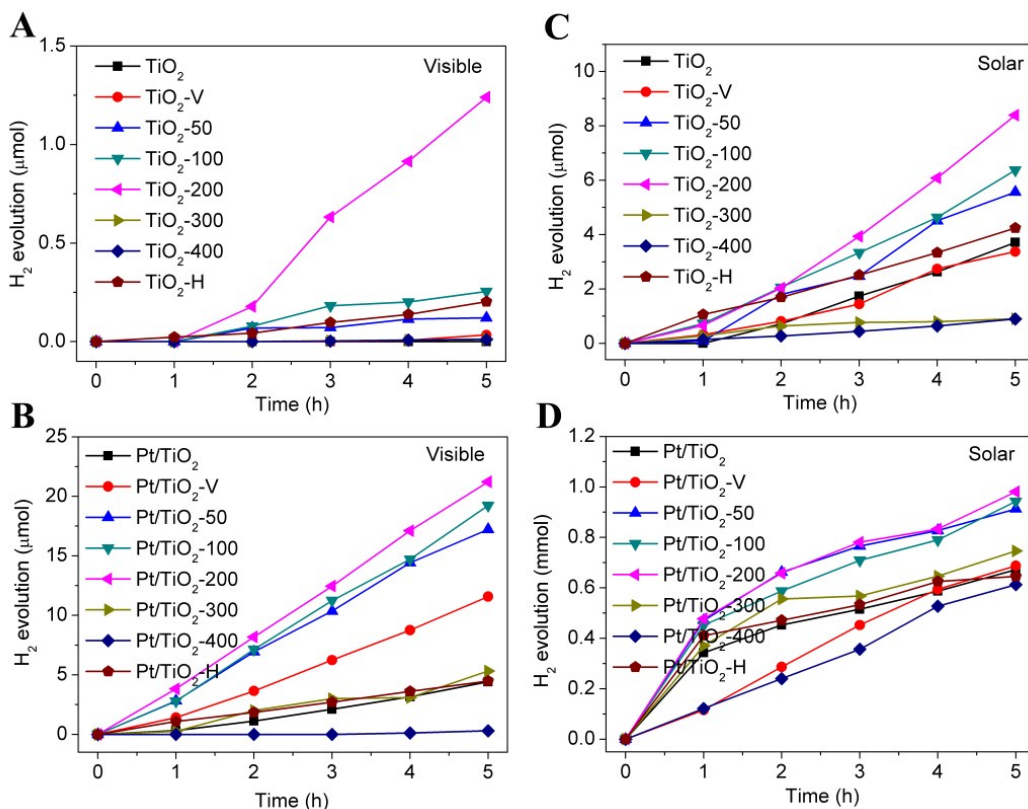

Figure S12 hydrogen evolution amount of (A) TiO<sub>2</sub>, TiO<sub>2</sub>-T (T=50, 100, 200, 300, and 400) obtained at different reaction temperature, TiO<sub>2</sub>-V and TiO<sub>2</sub>-H and (B) the corresponding Pt supported samples from EDTA-2Na solution (1.0 mg/ml) under visible light irradiation. Hydrogen evolution amount of (C) TiO<sub>2</sub>, TiO<sub>2</sub>-T (T=50, 100, 200, 300, and 400) obtained at different reaction temperature, TiO<sub>2</sub>-V and TiO<sub>2</sub>-H and (D) the corresponding Pt supported samples from EDTA-2Na solution (1.0 mg/ml) under solar light irradiation.

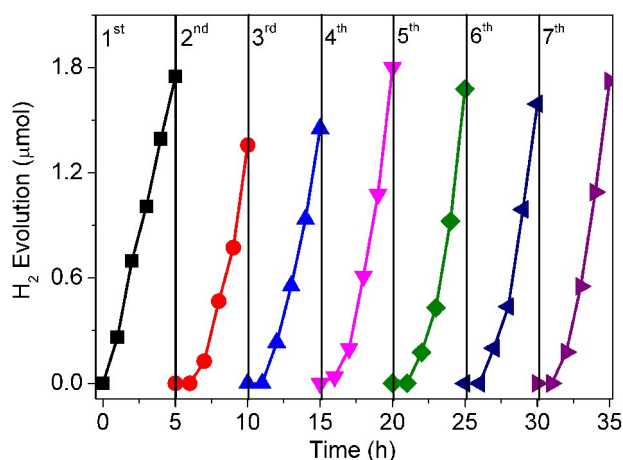

Figure S13 cycling test of TiO<sub>2</sub>-200 for photocatalytic H<sub>2</sub> generation from EDTA-2Na solution under visible light irradiation ( $\lambda > 420$  nm).

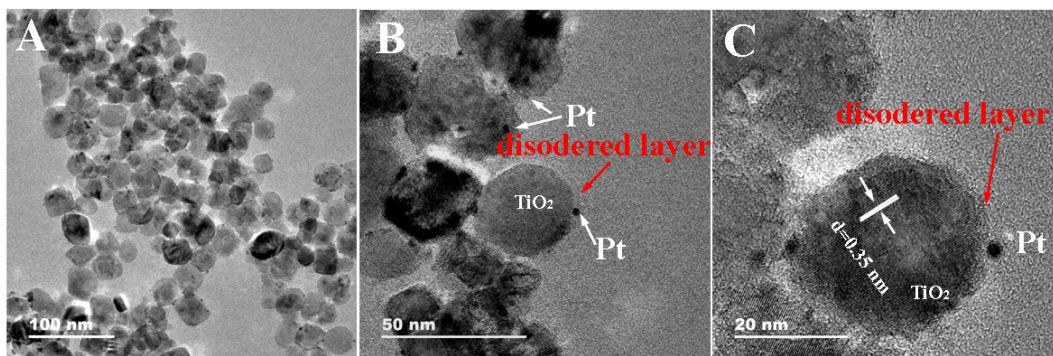

Figure S14 TEM (A and B) and HRTEM (C) images of Pt nanoparticles supported TiO<sub>2</sub>-200.
